# Supplementary material for: Accreditation of Biosafe Clinical-Grade Human Embryonic Stem Cells According to Chinese Regulations
Source: PubMed Central journal article supplement — Stem Cell Reports. 2017 May 11;9(1):366–80. doi: 10.1016/j.stemcr.2017.04.017 (PMC5511037; doi:10.1016/j.stemcr.2017.04.017), 2017-05-11
Supplement: mmc1.pdf [file mmc1.pdf]

**Stem Cell Reports, Volume 9**

**Supplemental Information**

**Accreditation of Biosafe Clinical-Grade Human Embryonic Stem Cells  
According to Chinese Regulations**

**Qi Gu, Juan Wang, Lei Wang, Zheng-Xin Liu, Wan-Wan Zhu, Yuan-Qing Tan, Wei-Fang Han, Jun Wu, Chun-Jing Feng, Jin-Hui Fang, Lei Liu, Liu Wang, Wei Li, Xiao-Yang Zhao, Bao-Yang Hu, Jie Hao, and Qi Zhou**

## Supplementary information

A

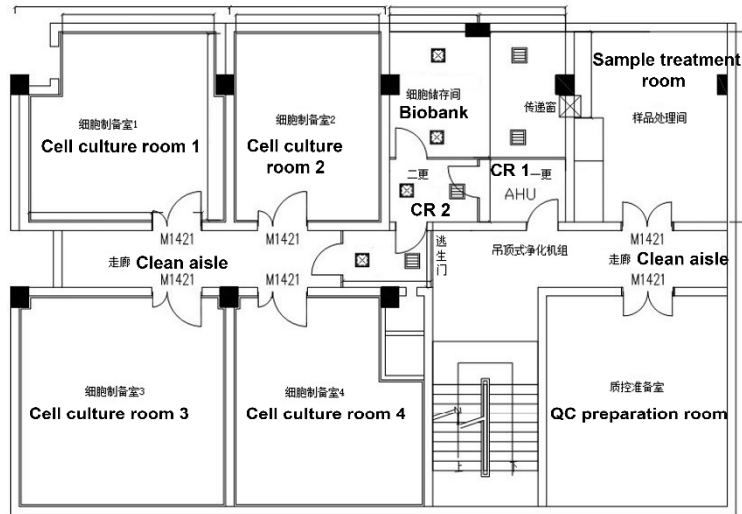

B

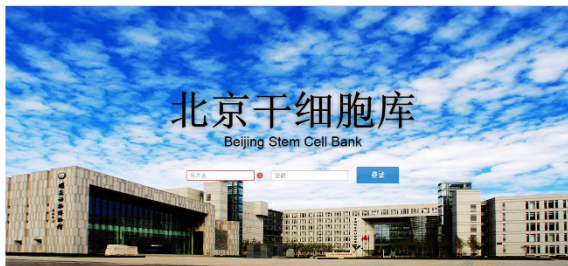

C

● Q-CTS-hESC-2--P47-4

|                              |                                                  |
|------------------------------|--------------------------------------------------|
| Name                         | Q-CTS-hESC-2--P47-4                              |
| Sample Source                | <a href="#">Q-Q-CTS-hESC-2017-03-15</a>          |
| Container                    | <a href="#">1/6 well</a>                         |
| Incubator                    | <a href="#">Incubator_09</a>                     |
| Generation                   | P47                                              |
| Medium Type                  | <a href="#">E8</a>                               |
| Passage Ratio                | 1:3                                              |
| Operation Room               | <a href="#">Clinical grade Room 2</a>            |
| Last Operating Time          | 2017.03.15, 17:00                                |
| Cell Type                    | <a href="#">Embryonic Stem Cell</a>              |
| Passage Operation            | <a href="#">Passage Operation 806</a>            |
| Cells in the Same Generation | <a href="#">Cells in the Same Generation 171</a> |
| Parent Cells                 | 3                                                |
| Own or Outside               | Own                                              |
| Last Operator                | 刘鑫                                               |

**Figure S1** The GMP lab information and the digital system to trace the cell line.

(A) The layout of GMP lab which mainly contains QC preparation room, sample treatment room, changing room, and four cell culture rooms. QC, quality control; CR, changing room. (B) The open interface of the software. (C) The display of one example cell line, Q-CTS-hESC-2.

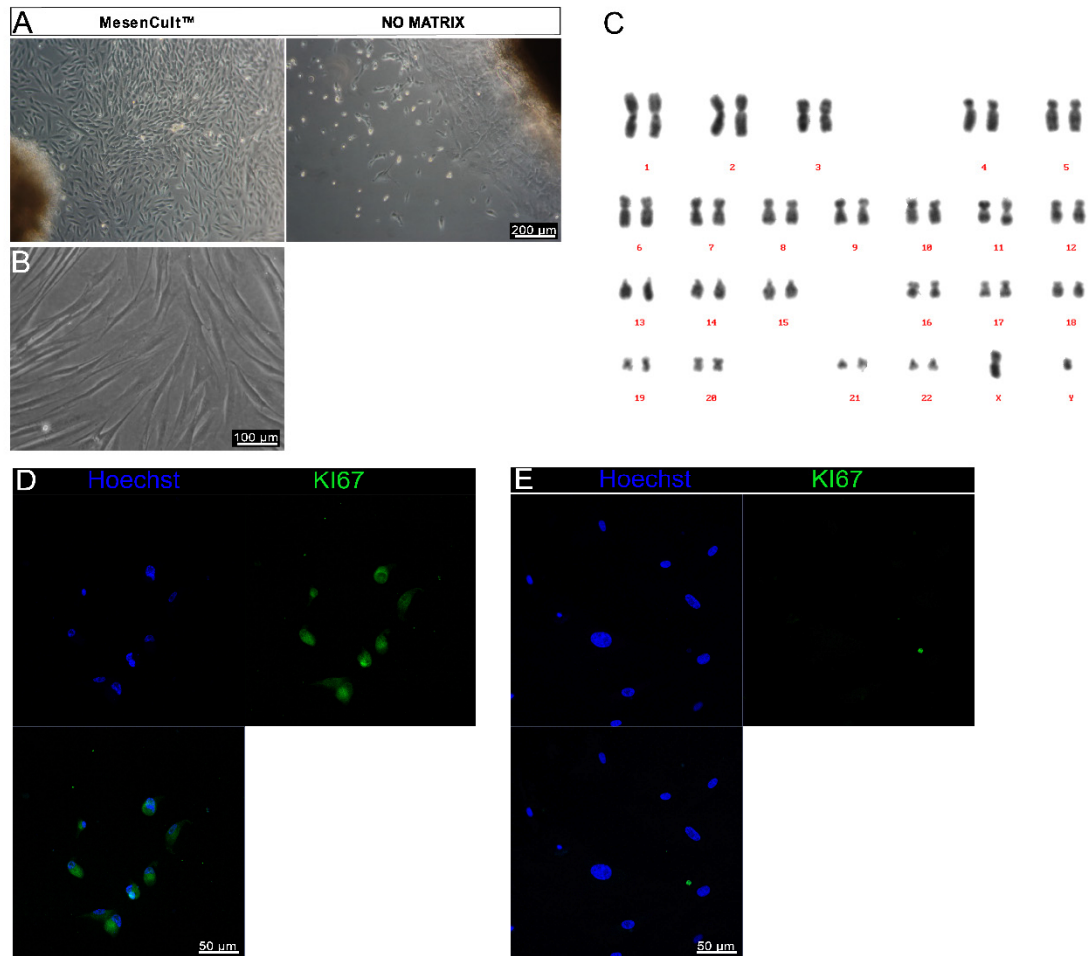

**Figure S2** HFF derivation. **(A)** Bright field images of HFFs migrated out of the minced tissues after 7 days of attachment. The substrates in the right and left groups were no matrix and MesenCult™ separately. **(B)** Stable passaged HFFs in SCFM medium on MesenCult™ substrate. Scale bars, 200  $\mu$ m. **(C)** Karyotype analysis of HFFs with normal 44 euchromosomes and one X chromosome, one Y chromosome. **(D)** Immunostaining of HFFs with KI67 (green) and Hoechst 33342 (blue) for nuclei. Scale bars, 50  $\mu$ m. **(E)** Staining inactivated feeder cells with KI67 (green) and Hoechst 33342 (blue) for nuclei. Scale bars, 50  $\mu$ m.

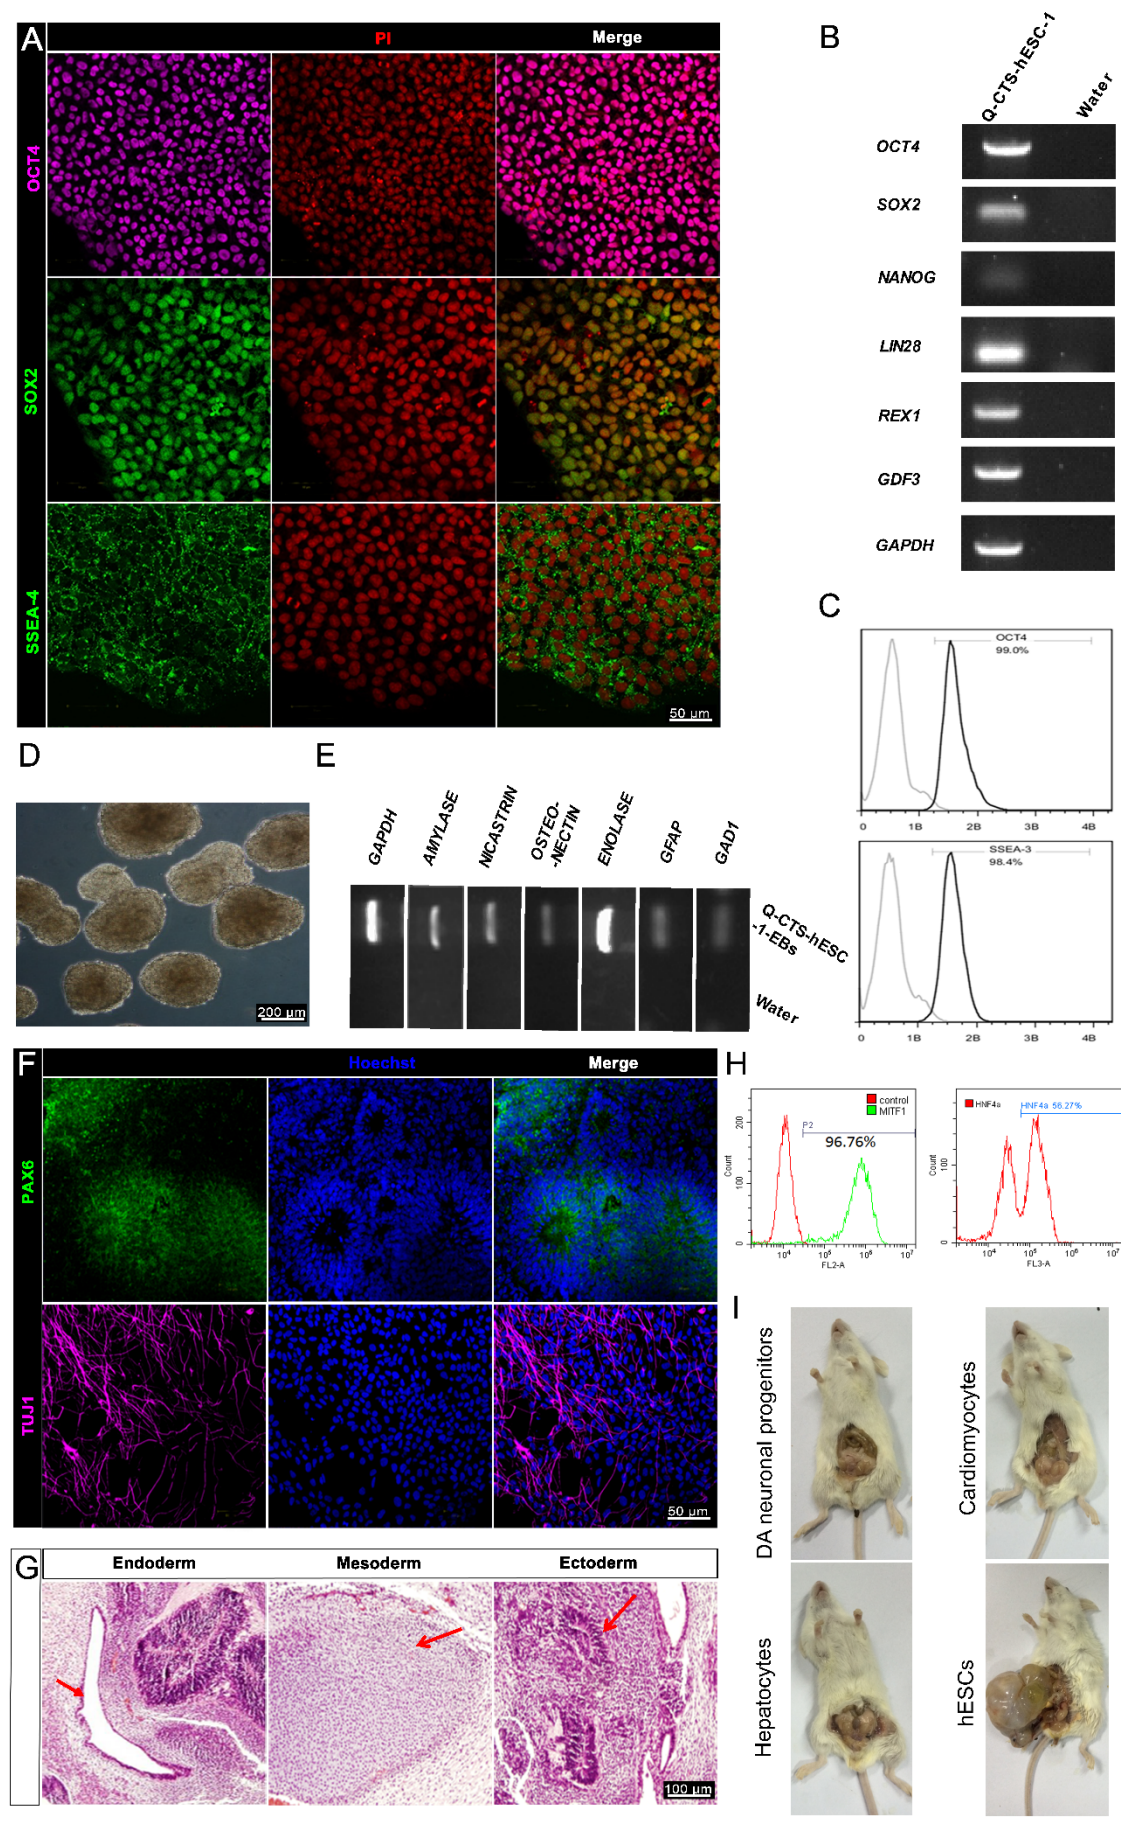

**Figure S3** Pluripotent characterizations of Q-CTS-hESC-1 cells and flow cytometry, teratoma formation test for differentiated Q-CTS-hESC-2 cells. **(A)**

Immunofluorescence analysis of Q-CTS-hESC-1 cells. Positive nuclear transcription factors OCT4 (purple) and SOX2 (green) and expression of the ESCs surface antigen SSEA4 (green) were observed. Nuclei were stained by PI (red). Scale bars, 50  $\mu$ m. **(B)** RT-PCR analysis of ESC specific genes confirmed their expression. **(C)** Quantitative flow cytometry analysis indicating robust expression of intracellular OCT4 and extracellular SSEA4 in Q-CTS-hESC-1 cells. **(D)** EB formation *in vitro*. Scale bars, 200  $\mu$ m. **(E)** RT-PCR of EBs showing transcript for ectoderm (*GAD1*, *GFAP*) mesoderm (*ENOLASE*, *OSTEONECTIN*) and endoderm (*AMYLASE*, *NICASTRIN*, *ALSO NAMED NCSTN*) markers. **(F)** Neurons differentiated from Q-CTS-hESC-1 EBs. Top, neuroepithelial cells (stained with PAX6 (green)) formed rosettes. Bottom, neuronal lineages were detected TUJ1 (purple) positive. Nuclei were stained by Hoechst 33342 (blue). Scale bars, 50  $\mu$ m. **(G)** Teratoma formation. All three germ layers tissues were presented on the teratoma dissection slices identified by staining with haematoxylin and eosin. As red arrows pointed, left, endoderm with glands; middle, mesoderm with cartilage tissues; right, ectoderm with nervous tissues. Scale bars, 100  $\mu$ m. **(H)** Flow cytometry analysis of RPE cells (left) at P3 and hepatocytes (right) on day 9 for the differentiated cells from cell line Q-CTS-hESC-2. **(I)** Teratoma formation test for the differentiated cells DA neuronal progenitors, cardiomyocyte and hepatocytes specialized from hESCs for the cell line Q-CTS-hESC-2.

## Supplementary tables

**Table S1** Progress in clinical-grade hESC derivation

| Year       | Country                 | Feeder/<br>Substrate | Xeno<br>-Free | Medium                            | Clinical<br>Trials | Biosafety<br>Test | Function<br><i>in vivo</i> | Ref                                               |
|------------|-------------------------|----------------------|---------------|-----------------------------------|--------------------|-------------------|----------------------------|---------------------------------------------------|
| 2006       | United States           | Mouse                | No            | containing KSR and Plasmanate     | Yes                | PASS              | Yes                        | Klimans kaya et al., 2006; Schwartz et al., 2012) |
| 2007       | Australia and Singapore | Human                | No            | containing KSR                    | No                 | PASS              | NA                         | Ludwig et al., 2006a                              |
| 2010       | Finland                 | Human                | Yes           | containing human serum albumin    | No                 | NA                | NA                         | Rajala et al., 2010                               |
| 2011       | United Kingdom          | Human#               | Yes           | KSR/TeSR2                         | No                 |                   | NA                         | Ilic et al., 2012                                 |
| 2012       | Israel                  | Human                | Yes           | SCGM (commercially available)     | No                 | PASS              | NA                         | Tannenbaum et al., 2012                           |
| This study | China                   | Human                | Yes           | STEMedia (commercially available) | No                 | PASS              | Yes                        |                                                   |

# Human ESCs were firstly cultured on HFF feeders and then transferred to StemAdhere substrate (commercially available)

**Table S2** GMP reagents for feeder cell production and banking and hESC line derivation and banking

| <b>Reagent</b>                                                      | <b>Supplier</b>          | <b>Catalog Number</b> | <b>Regulation</b>                                            |
|---------------------------------------------------------------------|--------------------------|-----------------------|--------------------------------------------------------------|
| <b>G-1™ medium</b>                                                  | Vitrolife                | 10127                 | Manufactured under cGMP and FDA clearance                    |
| <b>G-2™ medium</b>                                                  | Vitrolife                | 10131                 | Manufactured under cGMP and FDA clearance                    |
| <b>MesenCult™-XF Supplement (Mesencult™)</b>                        | STEMCELL Technologies    | 05422                 | Manufactured under ISO 13485 medical device standards        |
| <b>CTS™ KnockOut™ DMEM (CTS-KO-DMEM)</b>                            | Life Technologies        | A12861-01             | Manufactured under cGMP with DMF                             |
| <b>CTS™ KnockOut™ SR Xeno Free medium (CTS-KOSR)</b>                | Life Technologies        | 12618-012             | Manufactured under cGMP with DMF                             |
| <b>NutriStem™ XF/FF Culture Medium (STEMedia)</b>                   | Stemgent                 | 01-0005               | Manufactured under cGMP                                      |
| <b>Collagenase NB6</b>                                              | Serva                    | 17458.04              | Manufactured under cGMP and sterility tested according to EP |
| <b>CTS™ TrypLE™ Select Enzyme (CTS-Tryple)</b>                      | Life Technologies        | A12859-01             | Manufactured under cGMP with DMF                             |
| <b>CTS™ DPBS (CTS-DPBS)</b>                                         | Life Technologies        | A1285801              | Manufactured under cGMP with DMF                             |
| <b>Xeno-free Penicillin/streptomycin</b>                            | Lifeline Cell Technology | LS-1073               | Manufactured under cGMP                                      |
| <b>FibroGRO™ Xeno-Free Human Fibroblast Expansion Medium (SCFM)</b> | Millipore,               | SCM037                | Manufactured under cGMP with DMF                             |
| <b>Essential 8™ Medium</b>                                          | Life Technologies        | A1517001              | Manufactured under cGMP                                      |
| <b>Vitronectin</b>                                                  | Life                     | A14700                | Manufactured under cGMP                                      |

| <b>Reagent</b>                                                 | <b>Supplier</b>   | <b>Catalog Number</b> | <b>Regulation</b>                        |
|----------------------------------------------------------------|-------------------|-----------------------|------------------------------------------|
|                                                                | Technologies      |                       |                                          |
| <b>Non Essential Amino Acid (NEAA)</b>                         | Life Technologies | 11140050              | Manufactured under cGMP                  |
| <b>CTS™ GlutaMAX™-I Supplement (CTS-GlutaMAX)</b>              | Life Technologies | A12860-01             | Manufactured under cGMP with DMF         |
| <b>β-mercaptoethanol</b>                                       | Life Technologies | 21985023              | Manufactured under cGMP                  |
| <b>CTS™ KnockOut™ DMEM/F-12 (CTS-KO-DMEM/F12)</b>              | Life Technologies | A13708                | Manufactured under cGMP with DMF         |
| <b>CTS™ N-2 Supplement</b>                                     | Life Technologies | A13707-01             | Manufactured under cGMP with DMF         |
| <b>CTS™ CELLstart™ Substrate (CTS-CELLstart)</b>               | Life Technologies | A10142-01             | Manufactured under cGMP with DMF         |
| <b>CTS™ Neurobasal® Medium (CTS-Neurobasal)</b>                | Life Technologies | A13712-01             | Manufactured under cGMP with DMF         |
| <b>CTS™ B-27® Supplement (CTS-B27)</b>                         | Life Technologies | A14867                | Manufactured under cGMP with DMF         |
| <b>StemPro® Accutase® Cell Dissociation Reagent (Accutase)</b> | Life Technologies | A11105-01             | Manufactured under cGMP with DMF         |
| <b>Y-27632</b>                                                 | Selleck           | S1049                 | Manufactured under cGMP                  |
| <b>CHIR99021</b>                                               | Stemgent          | 04-0004               | Manufactured under cGMP                  |
| <b>IWR-1</b>                                                   | Calbiochem        | 681669                | Manufactured under cGMP                  |
| <b>Insulin</b>                                                 | Life Technologies | 12585-014             | Manufactured under cGMP                  |
| <b>RPMI1640</b>                                                | Life Technologies | 31800-022             | Manufactured under cGMP with Type II DMF |
| <b>Dimethyl Sulfoxide</b>                                      | Sigma-Aldrich     | D2348                 | BioPerformance Certified,                |



| <b>Reagent</b>                                        | <b>Supplier</b>          | <b>Catalog<br/>Number</b> | <b>Regulation</b>                                 |
|-------------------------------------------------------|--------------------------|---------------------------|---------------------------------------------------|
| <b>(DMSO)</b>                                         |                          |                           | Hybridoma, USP                                    |
| <b>IMDM</b>                                           | Life<br>Technologies     | 12440053                  | Manufactured under cGMP and<br>ISO 13485 standard |
| <b>Oncostatin M (OSM)</b>                             | R&D                      | 295-OM/CF                 | Manufactured under cGMP                           |
| <b>HGF</b>                                            | R&D                      | 294-HG/CF                 | Manufactured under cGMP                           |
| <b>Dexamethasone (Dex)</b>                            | Sigma-Aldrich            | D4902                     | Manufactured under cGMP                           |
| <b>MesenCult™-ACF<br/>Freezing Medium<br/>(ACF)</b>   | STEMCELL<br>Technologies | 05490                     | Manufactured under cGMP and<br>ISO 13485 standard |
| <b>STEM-<br/>CELLBANKER®<br/>GMP<br/>(CELLBANKER)</b> | Zenoaq                   | STEM-<br>CELLBANKER       | Manufactured under cGMP with<br>FDA clearance     |

**Table S3** Primer sequences for RT-PCR

| <b>Gene name</b>   | <b>Forward primers</b>            | <b>Reverse primers</b>          | <b>Product size (bp)</b> |
|--------------------|-----------------------------------|---------------------------------|--------------------------|
| <i>OCT4</i>        | GACAGGGGGAGGGGAGGAG<br>CTAGG      | CTTCCCTCCAACCAGTTGCC<br>CCAAAC  | 144                      |
| <i>SOX2</i>        | GGGAAATGGGAGGGGTGCA<br>AAAGAGG    | TTGCGTGAGTGTGGATGGGA<br>TTGGTG  | 161                      |
| <i>NANOG</i>       | CAGCCCCGATTCTCCACCA<br>GTCCC      | CGGAAGATTCCCAGTCGGGT<br>TCACC   | 380                      |
| <i>LIN28</i>       | GCAGAAGATCACTCCGTTCC<br>A         | CGCACATTGAACCACTTACA<br>GT      | 191                      |
| <i>REX1</i>        | CAGATCCTAAACAGCTCGCA<br>GAAT      | GCGTACGCAAATTAAGTCC<br>AGA      | 306                      |
| <i>GDF3</i>        | CTTATGCTACGTAAAGGAGC<br>TGGG      | GTGCCAACCCAGGTCCCGG<br>AAGTT    | 631                      |
| <i>AMYLASE</i>     | AATGATGCTACTCAGGTCAG<br>AGATT GTC | TGTCCTCGTTGATTGTCATG<br>GTTATCC | 461                      |
| <i>NICASTRIN</i>   | CGAGGATGGTCTACGATATG<br>GAGAAGG   | TCAGCCAGAACAACGCCAG<br>AGAT     | 307                      |
| <i>ENOLASE</i>     | GCTCCGTGACCGAGTCTCTT              | TAGCCAACAGGTGACCGAA<br>GG       | 301                      |
| <i>OSTEONECTIN</i> | CCAGGTGGAAGTAGGAGAA<br>TT         | CTCAGTCAGAAGGTTGTTGT<br>C       | 427                      |
| <i>GAD1</i>        | GGAAGTAGCGAGAACGAGG<br>AAG        | AGGAGGTTGCGGACGAAGA<br>T        | 235                      |
| <i>GFAP</i>        | TGAGTCGCTGGAGGAGGAG<br>AT         | GTCGTTGGCTTCGTGCTTGG            | 283                      |
| <i>GAPDH</i>       | AGGCATCCTCACCTGAAGT<br>A          | CACACGCAGCTCATTGTAGA            | 103                      |

## **Supplementary methods**

### **Ethical approval**

Clinically discarded oocytes that were not suitable for *in vitro* fertilization (IVF) were used in this study for parthenogenetic hESC derivation. Early-stage embryos (for fertilized hESC derivation) used in this study were obtained from clinically discarded embryos that were not suitable for transplantation. Both oocytes and early embryos had been cryopreserved for at least five years. Foreskin tissues (for feeder cell derivation) used in this study were obtained from children who were undergoing foreskin resection surgery. The study was approved by the “Animal and Medical Ethics Committee of the Institute of Zoology, Chinese Academy of Sciences” (Ethical No. IOZ15033 and IOZ15038). Written consent was obtained from the couples or the donor’s parents. After donation, a thorough assessment of the donors’ medical history and infectious diseases was conducted. Only donors without any pathogenic microorganism infection or genetic disease were selected. All information was secured to protect the privacy and confidentiality of the donors. No financial benefits were involved in the donation process. The guidelines legislated and posted by the Ministry of Health of the People’s Republic of China were closely followed for all tissue and cell handling procedures.

### **Cell transplantation and immunohistochemistry**

Twenty-four hours before transplantation, the DA neuronal progenitors were stained with Molday ION™ (Biopal) according to the manufacturer’s instructions. Then, the cells were digested into single cells using TrypLE and resuspended in cell culture medium supplemented with 0.05% DNase at a density of  $6.25 \times 10^5$  cells/mL. The methods for anesthetizing and fixing the rat PD models were similar to those described in the modeling section. The cell transplantation position was AP = +1.0 mm, ML = +2.5 mm with respect to the bregma and DV = -4.5/-5.0 mm with respect to the dura. Then, 5  $\mu$ L of cell suspension was injected into each animal at a rate of 0.8  $\mu$ L per minute. After injection, the needle remained in situ for a further 5 minutes to prevent diffusion. The

control animals were injected with 5  $\mu$ L of cell culture medium only. Three months after cell transplantation, the rats were deeply anesthetized with pentobarbital (25 mg/kg, i.v.). The bodies were transcardially perfused with heparinized normal saline followed by 4% (w/v) PFA. The brain tissue was removed from the skulls and sliced in the coronal plane with a calibrated Lucite brain slice apparatus. Immediately after primary fixation, the brain tissues were post-fixed in 4% PFA for 1-3 days and then rinsed and soaked successively in 10% (w/v), 20% (w/v), and 30% (w/v) sucrose solutions to “sink”. The brains were cut coronally into 40  $\mu$ m serial sections on a frozen sledge microtome and stored free-floating in cryoprotectant medium (30% (w/v) sucrose, 30% (w/v) ethylene glycol in PBS) at -20°C.

After washing with cold PBS, the coronal brain tissue sections were permeated and blocked with 1% (w/v) BSA and 0.3% (v/v) Triton. Primary antibodies diluted in 2% BSA were added to the sections and incubated for one hour at room temperature. The primary antibodies used were anti-tyrosine hydroxylase (TH, Santa Cruz, sc-14007, 1:200), anti-Nuclei (HNA, Millipore, clone 235-1, 1:200), and anti-GFAP (Millipore, clone EP672Y, 1:250). After sufficient washing in dilution media, appropriate secondary antibodies (FITC, Jackson ImmunoResearch, 1:200) were added and incubated for 1 hour at room temperature. Finally, the nuclei were stained with Hoechst 33342 (10  $\mu$ g/mL) for 10 minutes at room temperature.

BTDC-QRD-JSC-068(1)

# 洁净室检测报告书

CLEANROOMS TESTING REPORT

北京市药品检验所  
北京医药洁净检测中心

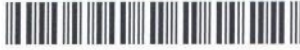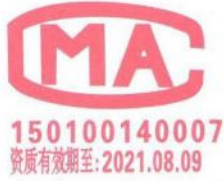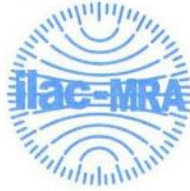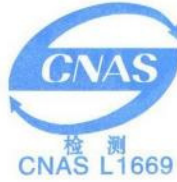

## 洁净室检测报告书

报告编号: JE1600403

申检单位: 中国科学院动物研究所北京干细胞库

检测区域: 北京干细胞库细胞间

检测区域地址: 北京市海淀区北四环西路25-2北京干细胞库

检测单位: 北京市药品检验所  
(北京医药洁净检测中心)

报告日期: 2016.6.15

结论: 本区域按《医药工业洁净厂房设计规范》(GB50457—2008)检测, 结果符合十万级、万级规定。

授权签字人: 黄 智

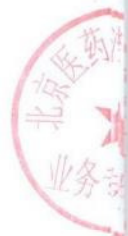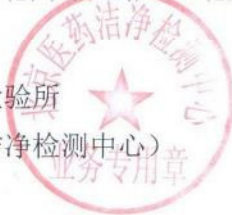

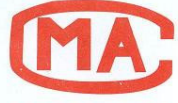

2012000599S

中国食品药品检定研究院

# 检验报告

报告编号: SH201402035

检品名称: Q-CTS-hESC-2人胚胎干细胞

供样单位: 中国科学院动物研究所

检定目的: 合同检验

检验依据: 约定方法

# 中国食品药品检定研究院检验报告

报告编号: SH201402035

第1页, 共6页

|                  |                    |                                                                                                                                                                                                                                                                                            |                  |
|------------------|--------------------|--------------------------------------------------------------------------------------------------------------------------------------------------------------------------------------------------------------------------------------------------------------------------------------------|------------------|
| 检品名称             | Q-CTS-hESC-2人胚胎干细胞 | 检品编号                                                                                                                                                                                                                                                                                       | SH0417201301875  |
| 供样单位             | 中国科学院动物研究所         | 菌号/代次                                                                                                                                                                                                                                                                                      | 编号: P40、代次: P40代 |
| 检品来源             | 中国科学院动物研究所北京干细胞库   | 检品状态                                                                                                                                                                                                                                                                                       | 液体               |
| 检验目的             | 合同检验               | 检品数量                                                                                                                                                                                                                                                                                       | 50个              |
| 检验项目             | 部分检验               | 收样日期                                                                                                                                                                                                                                                                                       | 2013年11月6日       |
| 检验依据             | 约定方法               |                                                                                                                                                                                                                                                                                            |                  |
| 检验项目             | 标准规定               | 检验结果                                                                                                                                                                                                                                                                                       |                  |
| [细胞鉴别试验]         |                    |                                                                                                                                                                                                                                                                                            |                  |
| 细胞形态检查           | 报告结果               | 细胞呈二维克隆生长, 克隆边缘清晰、表面光滑, 克隆内细胞与细胞之间的连接紧密, 看不清细胞界限                                                                                                                                                                                                                                           |                  |
| 种属鉴别(同工酶法)       | 人源细胞B型             | 符合规定                                                                                                                                                                                                                                                                                       |                  |
| 细胞株鉴别(人源STR图谱分析) | 报告结果               | Amelogenin: X;<br>vWA: 17, 18;<br>D21S11: 30.2, 32.2;<br>D18S51: 13, 14;<br>PentaE: 10, 12;<br>D5S818: 9, 10;<br>D13S317: 8, 11;<br>D7S820: 12;<br>D16S539: 9, 11;<br>FGA: 20, 22;<br>D3S1358: 16, 18;<br>TH01: 6, 9;<br>D8S1179: 13, 15;<br>TPOX: 8;<br>CSF1PO: 9, 13;<br>PentaD: 13, 15。 |                  |

接下页

(The full part of the documents could be asked from the authors.)
